# Supplementary material for: Gene expression analysis in endometriosis: Immunopathology insights, transcription factors and therapeutic targets
Source: PubMed Central journal article supplement (PMC9748153; doi:10.3389/fimmu.2022.1037504), 2022-11-30
Supplement: DataSheet_3.pdf [file DataSheet_3.pdf]

# Supplementary Material

## Supplementary Figures

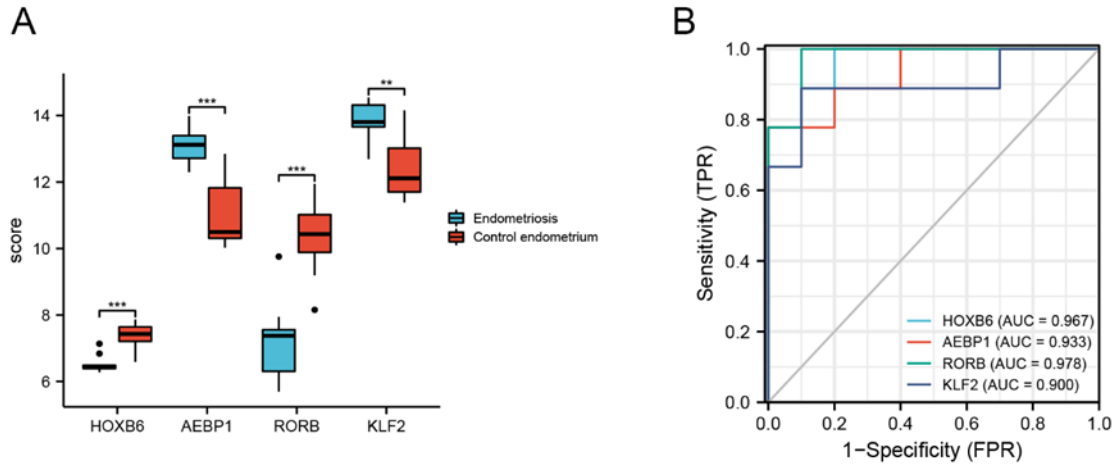

Supplementary Figure 1 | The expression (A) and ROC curves (B) for AEBP1, HOXB6, KLF2, and RORB in the GSE23339 dataset.

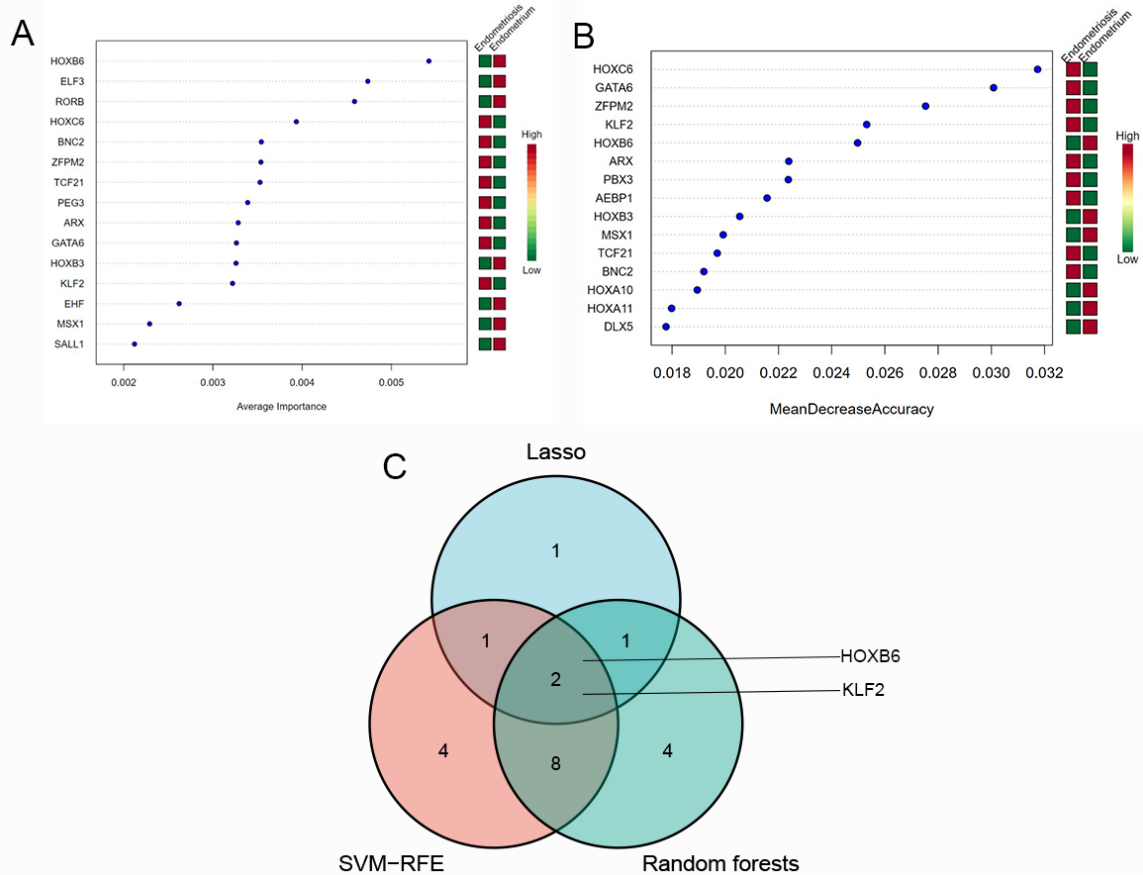

Supplementary Figure 2 | Multiple machine learning models identified key TFs (KLF2, HOXB6) for GSE7305. (A) The genes were selected based on RFE-SVMs algorithm. (B) Random forest model was employed to pick genes. (C) Intersection of genes generated from Lasso, RFE-SVMs, and Random forest model.
